# Supplementary material for: Identification of AHL Synthase in Desulfovibrio vulgaris Hildenborough Using an In-Silico Methodology
Source: MDPI journal article supplement (doi:10.3390/catal13020364), 2023-02-07
Supplement: s1 [file s1]

**Table S1:** A brief description of the AHL synthase genes mentioned in Figure 2.

| Genes       | Organisms                                        | Description                                                                                                                                                                                                                                                                           | References |
|-------------|--------------------------------------------------|---------------------------------------------------------------------------------------------------------------------------------------------------------------------------------------------------------------------------------------------------------------------------------------|------------|
| <i>lasI</i> | <i>Pseudomonas aeruginosa</i>                    | Required for the synthesis of PAI consisting of 3-oxo-N-(tetrahydro-2-oxo-3-furanyl)-dodecanamide also known as N-(3-oxododecanoyl) homoserine lactone, an autoinducer molecule which binds to LasR and thus acts in elastase biosynthesis regulation.                                | [25]       |
| <i>traI</i> | <i>Agrobacterium fabrum</i>                      | Required for the synthesis of OHHL (N-(3-oxohexanoyl)-L-homoserine lactone), an autoinducer molecule which binds to TraR and thus acts in the control of conjugal transfer                                                                                                            | [26]       |
| <i>expI</i> | <i>Pectobacterium parmentieri</i>                | Required for the synthesis of OHHL (N-(3-oxohexanoyl)-L-homoserine lactone), an autoinducer molecule which binds to ExpR and thus acts in virulence (soft rot disease) through the activation of genes for plant tissue macerating enzymes.                                           | [27]       |
| <i>ainS</i> | <i>Vibrio fischeri</i>                           | catalyzes the synthesis of N-octanoylhomoserine lactone.                                                                                                                                                                                                                              | [28]       |
| <i>esaI</i> | <i>Pantoea stewartii</i> subsp. <i>stewartii</i> | Required for the synthesis of OHHL (N-(3-oxohexanoyl)-L-homoserine lactone), an autoinducer molecule which binds to EsaR.                                                                                                                                                             | [29]       |
| <i>luxI</i> | <i>Aliivibrio fischeri</i>                       | Required for the synthesis of OHHL (N-(3-oxohexanoyl)-L-homoserine lactone) also known as VAI or N-(beta-ketocaproyl) homoserine lactone or 3-oxo-N-(tetrahydro-2-oxo-3-furanyl)-hexanamide, an autoinducer molecule which binds to LuxR and thus acts in bioluminescence regulation. | [30]       |
| <i>soll</i> | <i>Ralstonia solanacearum</i>                    | Required for the synthesis of acyl-HSL autoinducers that bind to SolR.                                                                                                                                                                                                                | [31]       |
| <i>bjaI</i> | <i>Bradyrhizobium japonicum</i>                  | Catalyzes the synthesis of isovaleryl-HSL (IV-HSL)                                                                                                                                                                                                                                    | [32, 33]   |
| <i>cepI</i> | <i>Burkholderia cepacia</i>                      | Catalyzes the synthesis of synthesis of C8-HSL.                                                                                                                                                                                                                                       | [34]       |
| <i>psyI</i> | <i>Pseudomonas amygdali</i> pv. <i>tabaci</i>    | Required for the synthesis of OHHL (N-(3-oxohexanoyl)-L-homoserine lactone)                                                                                                                                                                                                           | [35]       |
| <i>rhII</i> | <i>Pseudomonas aeruginosa</i>                    | Required for the synthesis of BHL (N-butanoyl-L-homoserine lactone), and HHL (N-hexanoyl-L-homoserine lactone) autoinducer molecules which bind to RhIR                                                                                                                               | [36]       |
| <i>anoI</i> | <i>Acinetobacter nosocomialis</i>                | Involved in the synthesis of the acyl-homoserine lactone (AHL) signal N-(3-hydroxydodecanoyl)-L-HSL (3-hydroxy-C12-HSL or OH-dDHL)                                                                                                                                                    | [37]       |
| <i>pagI</i> | <i>P. agglomerans</i> pv. <i>gypsophila</i>      | Produces N-butanoyl-l-homoserine lactone (C4-HSL) as a major and N-hexanoyl-l-homoserine lactone (C6-HSL) as a minor QS signal.                                                                                                                                                       | [38]       |

|             |                                             |                                                                                                                                                                              |          |
|-------------|---------------------------------------------|------------------------------------------------------------------------------------------------------------------------------------------------------------------------------|----------|
| <i>luxM</i> | <i>Vibrio harveyi</i>                       | Required for the synthesis of an autoinducer molecule beta-hydroxybutyryl homoserine lactone, which binds to LuxN and thus acts in bioluminescence regulation                | [39]     |
| <i>yenI</i> | <i>Yersinia enterocolitica</i>              | Required for the synthesis of autoinducer molecules such as OHHL (N-(3-oxohexanoyl)-L-homoserine lactone), and HHL (N-hexanoyl-L-homoserine lactone).                        | [40]     |
| <i>RaiI</i> | <i>Rhizobium etli</i>                       | Required for the synthesis of autoinducer molecules which bind to RaiR and that are involved in the restriction of nodule number.                                            | [41]     |
| <i>bpsI</i> | <i>Burkholderia pseudomallei</i>            | BpsI-BpsR system produces N-octanoylhomoserine lactone (C8HL) and is positively auto-regulated by its AHL product                                                            | [42]     |
| <i>abaI</i> | <i>Acinetobacter baumannii</i>              | Involved in the synthesis of the acyl-homoserine lactone (AHL) signal N-(3-hydroxydodecanoyl)-L-HSL (3-hydroxy-C12-HSL or OH-dDHL). Required for normal biofilm development. | [43]     |
| <i>bpmI</i> | <i>Burkholderia pseudomallei</i>            | bpmIR system produce C10HSL, 3-hydroxy-C8HSL, 3-oxo-C10HSL, 3-hydroxy-C10HSL, and 3-oxo-C14HSL                                                                               | [44]     |
| <i>vanM</i> | <i>Vibrio anguillarum</i>                   | Required for the synthesis of N-(3-hydroxyhexanoyl) homoserine lactone (3-hydroxy-C6-HSL) and N-hexanoylhomoserine lactone (C6-HSL).                                         | [45]     |
| <i>cinI</i> | <i>Rhizobium leguminosarum</i>              | Produces N-(3-hydroxy-7-cis-tetradecenoyl)-L-homoserine lactone                                                                                                              | [46, 47] |
| <i>bviL</i> | <i>Burkholderia vietnamiensis</i> strain G4 | Produces N-decahomoserine lactone                                                                                                                                            | [48]     |
| <i>ypeI</i> | <i>Yersinia pestis</i>                      | Produces N-3-oxooctanoyl-L-homoserine lactone and N-3-oxo-hexanoyl-L-homoserine lactone.                                                                                     | [49]     |
| <i>ypsI</i> | <i>Yersinia pseudotuberculosis</i>          | Produces 3-oxo-substituted C6, C7 and C8 AHLs and the unsubstituted C6 and C8 compounds                                                                                      | [50]     |

**Table S2:** Stereochemical analysis of acyl carrier protein (acpP) and AHL synthase

|                  | Validation Parameters     | AHL synthase    | Goal             |
|------------------|---------------------------|-----------------|------------------|
| Protein geometry | Poor rotamers             | 3 (1.95%)       | <0.3%            |
|                  | Favored rotamers          | 144 (93.51%)    | >98%             |
|                  | Ramachandran outliers     | 0 (0.00%)       | <0.05%           |
|                  | Ramachandran favored      | 174 (97.21%)    | >98%             |
|                  | Rama distribution Z-score | 0.58±0.62       | Abs(Z score) < 2 |
|                  | Cβ deviations >0.25Å      | 0 (0.00%)       | 0%               |
|                  | Bad bonds                 | 0/1502 (0.00%)  | 0%               |
|                  | Bad angles                | 28/2045 (1.37%) | <0.1%            |
| Peptide omegas   | Cis Prolines              | 1/15 (6.67%)    | ≤1 per chain     |
|                  | CaBLAM outliers           | 6 (3.4%)        | <1.0%            |

|                         |                        |           |       |
|-------------------------|------------------------|-----------|-------|
| Low-resolution criteria | CA Geometry outliers   | 4 (2.26%) | <0.5% |
| Additional              | Chiral volume outliers | 0/215     | 0     |

Note: Parameters highlighted in green were optimized to the required goal.

**Table S3:** The statistical t-test between the predictive AlphaFold- and modeler- based structure of probable AHL synthase.

|                              | Variable 1 | Variable 2 |
|------------------------------|------------|------------|
| Mean                         | -0.04155   | -0.04092   |
| Variance                     | 2.13E-05   | 2.11E-05   |
| Observations                 | 181        | 181        |
| Hypothesized Mean Difference | 0          |            |
| df                           | 360        |            |
| t Stat                       | -1.30117   |            |
| P(T<=t) one-tail             | 0.097016   |            |
| t Critical one-tail          | 1.649097   |            |
| P(T<=t) two-tail             | 0.194031   |            |
| t Critical two-tail          | 1.966575   |            |

**Table S4:** The detailed interactions between the modeled AHL synthase and the AHL substrates (Available as an excel file).

**Table S5:** Details of fatty acyl molecules and their respective AHL products in different organisms reported in literature (Available as an excel file).

**Table S6:** Candidate fatty acyl molecules and their respective three-dimensional chemical structures used in this study

| Precursor molecule name | Precursor molecule CID | Chemical Structures                                                                  |
|-------------------------|------------------------|--------------------------------------------------------------------------------------|
| 3-Oxohexanoic acid      | 439658                 | 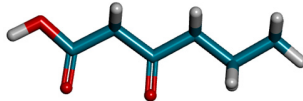 |
| 3-Oxododecanoic acid    | 439717                 |  |

Butyric acid

264

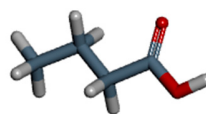

(Z)-3-Hydroxy-7-tetradecenoic acid

44610299

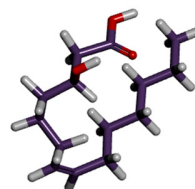

p-coumaric acid

637542

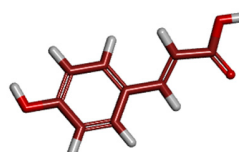

3-hydroxybutanoic acid

441

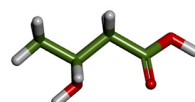

octanoic acid

379

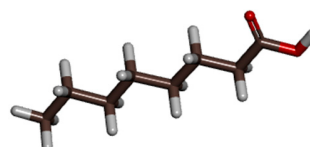

Decanoic acid

2969

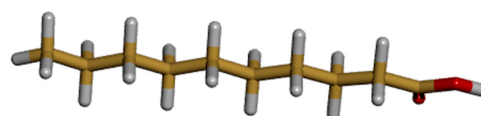

3-Hydroxydodecanoic acid

94216

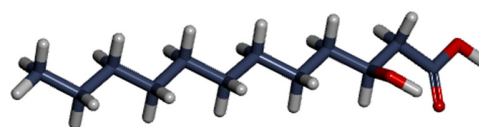

3-Hydroxytetradecanoic acid

16064

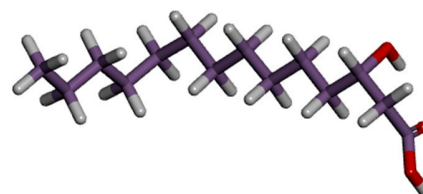

3-Hydroxydecanoic acid

26612

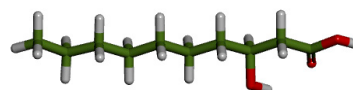

3-oxodecanoic acid

5282982

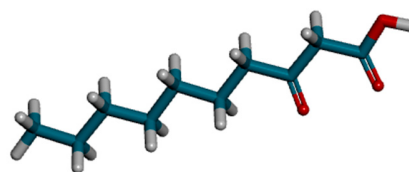

Isovaleric acid

10430

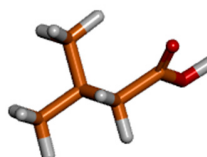

Dodecanoic acid

3893

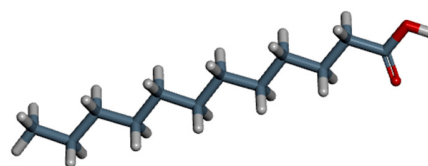

Myristoleic acid

5281119

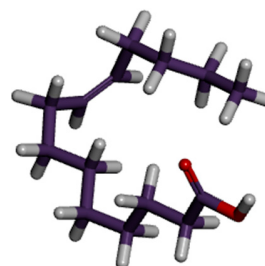

3-Oxo-octanoic acid

128859

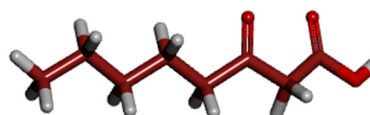

Hexanoic acid

8892

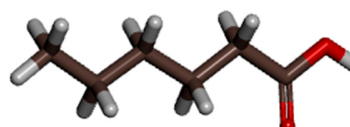

3-oxobutanoic acid

96

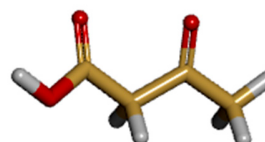

---

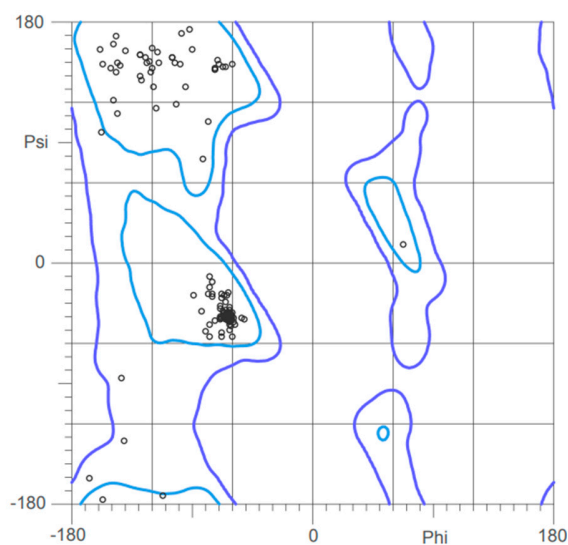

**Figure S1:** Ramachandran plot depicting measurement of backbone dihedral angles ( $\phi$ , phi and  $\psi$ , psi) in acyl homoserine lactone (AHL) synthase.

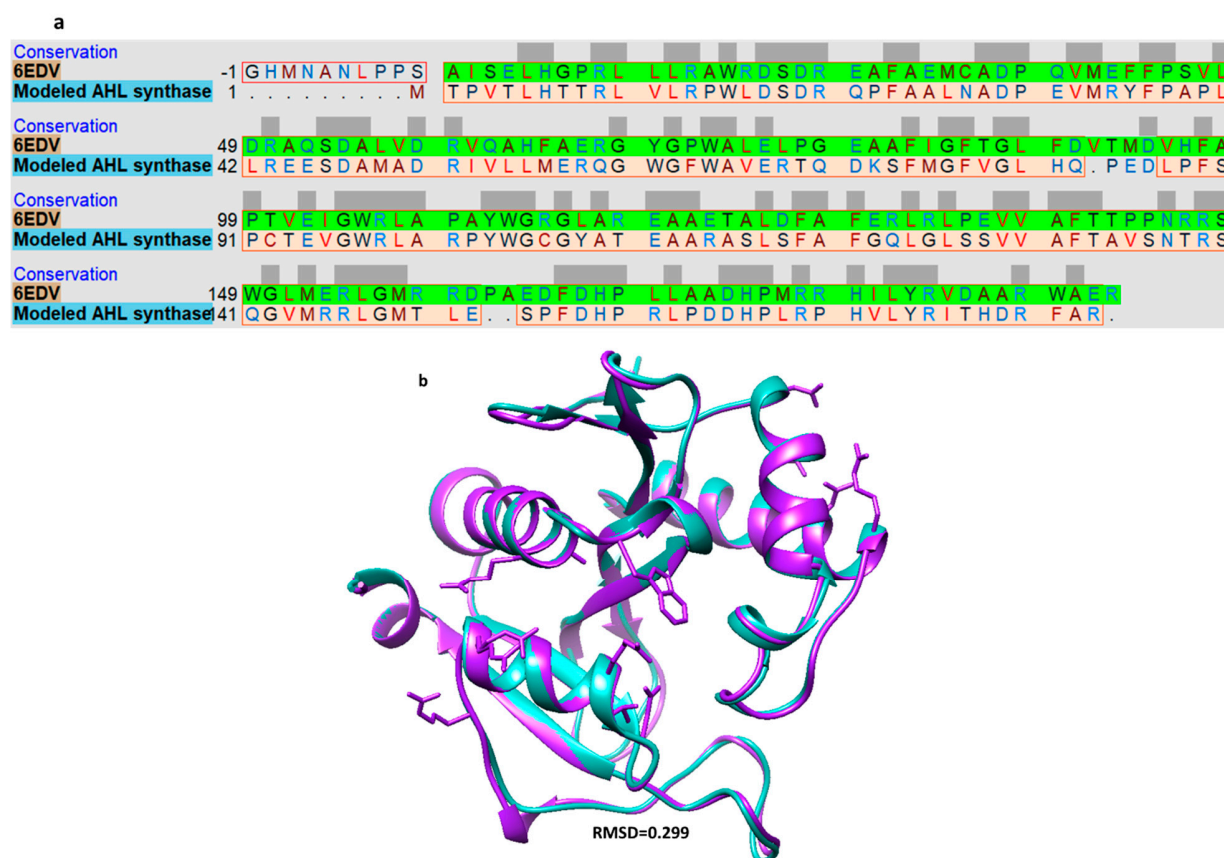

**Figure S2:** (a) The alignment of amino acids, and (b) superimposition, between the modeled AHL synthase and the template (#6EDV)

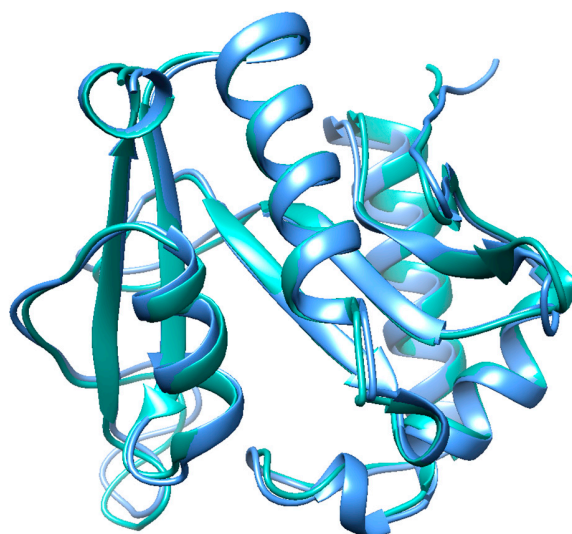

**Figure S3:** Superimposition between the predictive AlphaFold- (green) and modeler- based (blue) structure of probable AHL synthase.

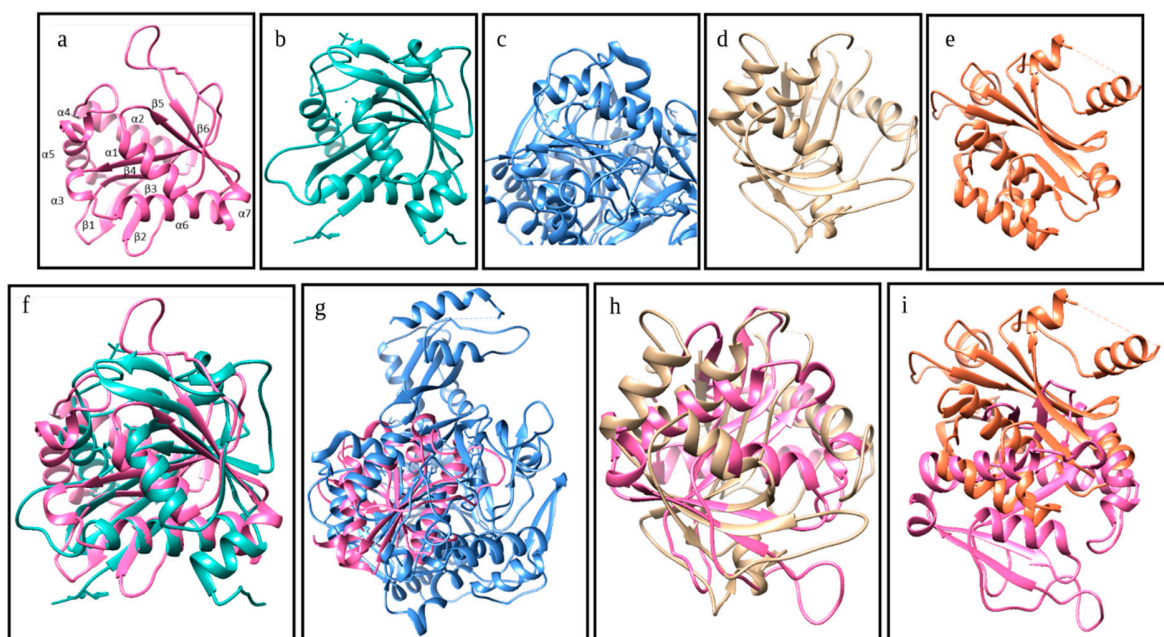

**Figure S4:** The individual structures of (a) modeled AHL synthase, (b) PDB# 1RO5, (c) PDB# 2P2F, (d) PDB# 6WNS, and (e) PDB# 1KZF. The superimposition between the modeled AHL synthase and (f) PDB# 1RO5, (g) PDB# 2P2F, (h) PDB# 6WNS, and (i) PDB# 1KZF.

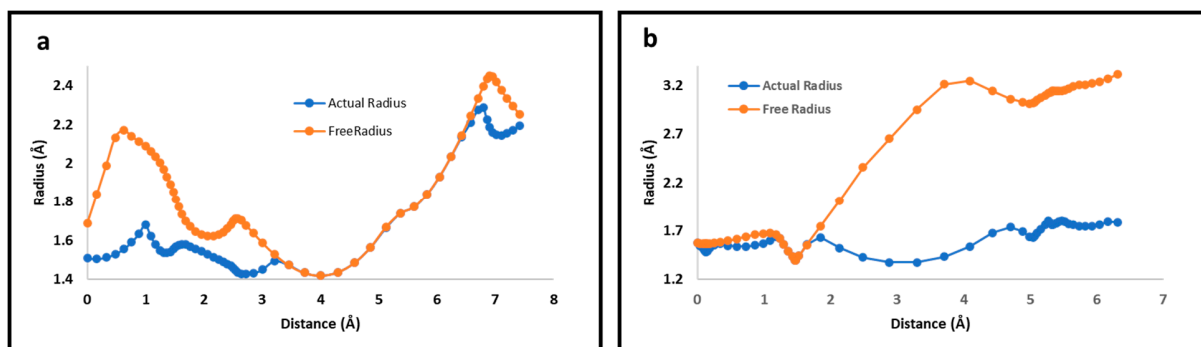

**Figure S5:** The actual and free radius variation with tunnel distances in (a) PS 2, and (b) PS 3.
